# Supplementary material
Source: Springer Nature journal article supplement (https://www.springermedizin.de/resource/supplementary/12916_2012_711_MOESM6_ESM.pdf/9598732)

**FVL-CONTROL****FVL Q/+ -APS****FVL Q/Q -APS**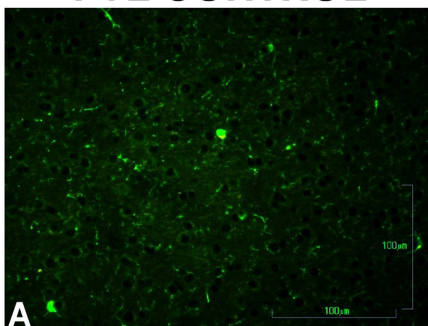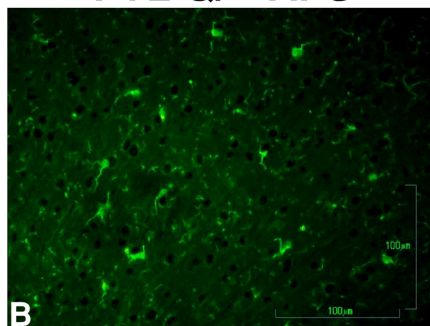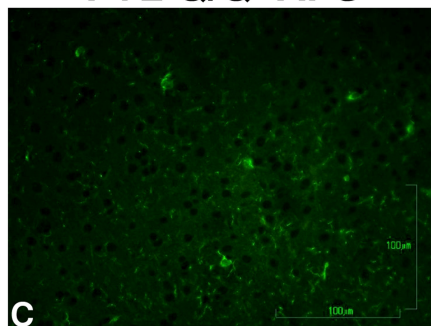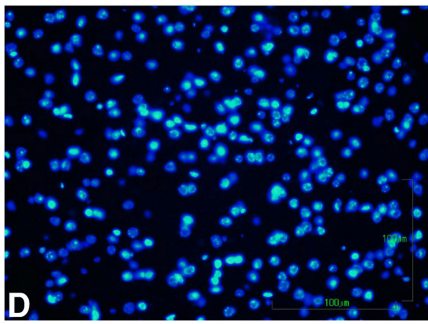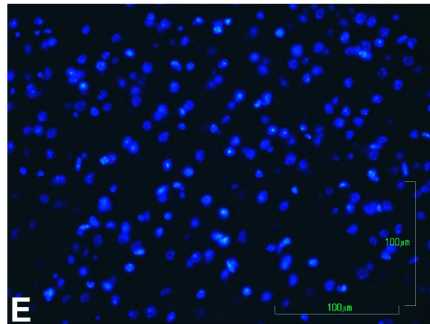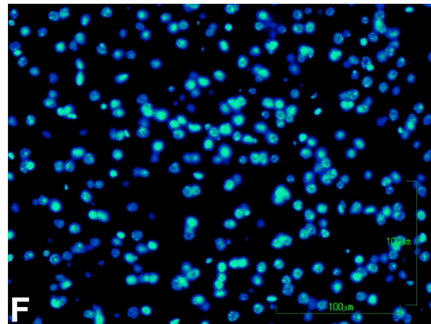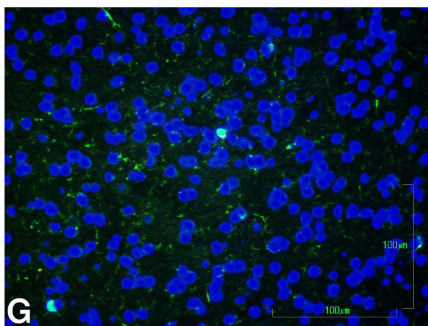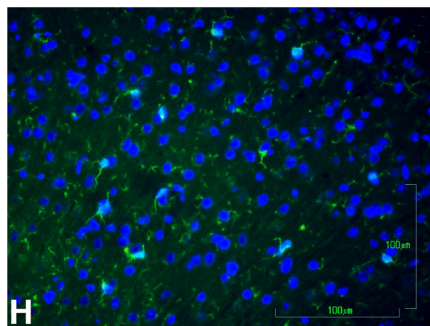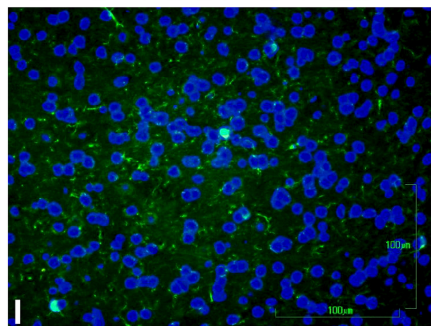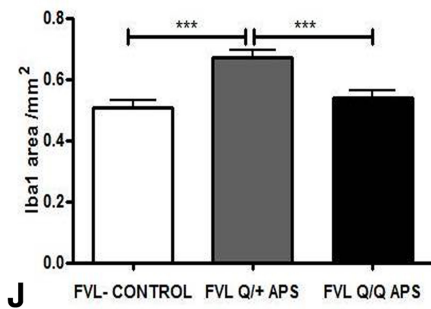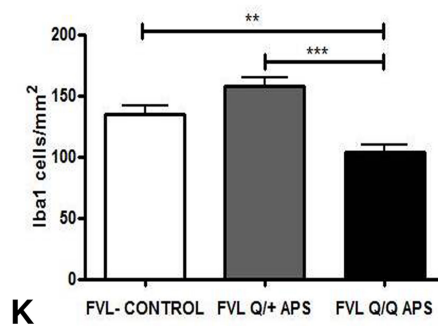

Supplement: MOESM6 [file 9598732]
